# Supplementary figures and images for: Spatiotemporal tissue maturation of thalamocortical pathways in the human fetal brain
Source: eLife journal article supplement (doi:10.7554/elife.83727), 2023-04-03

(a) **Thalamic-sensory tract**

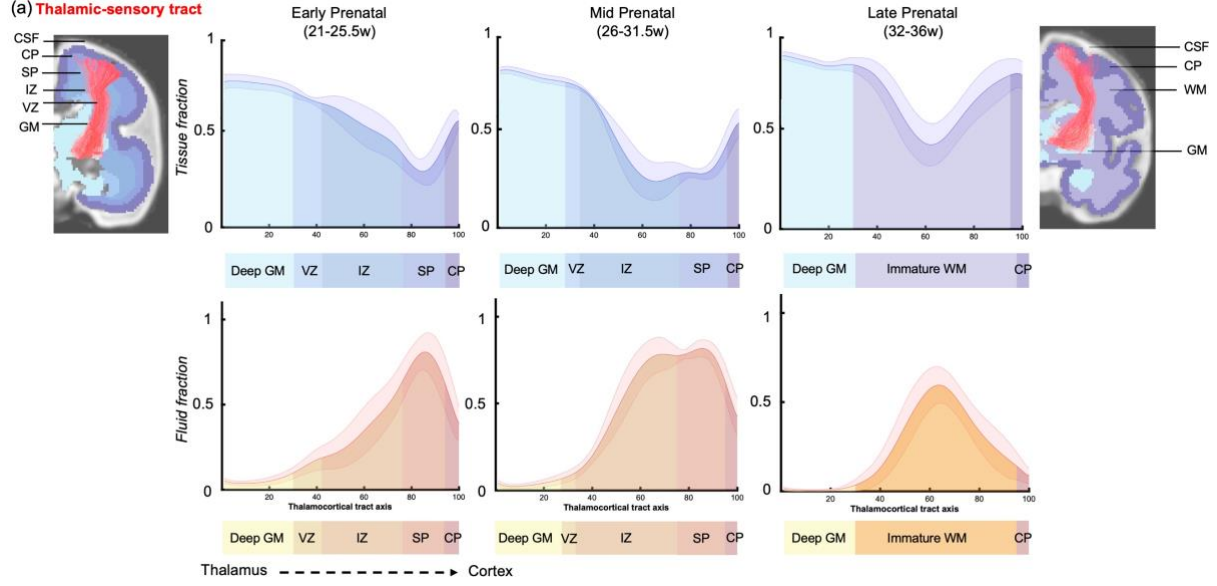

(b) **Posterior-parietal tract**

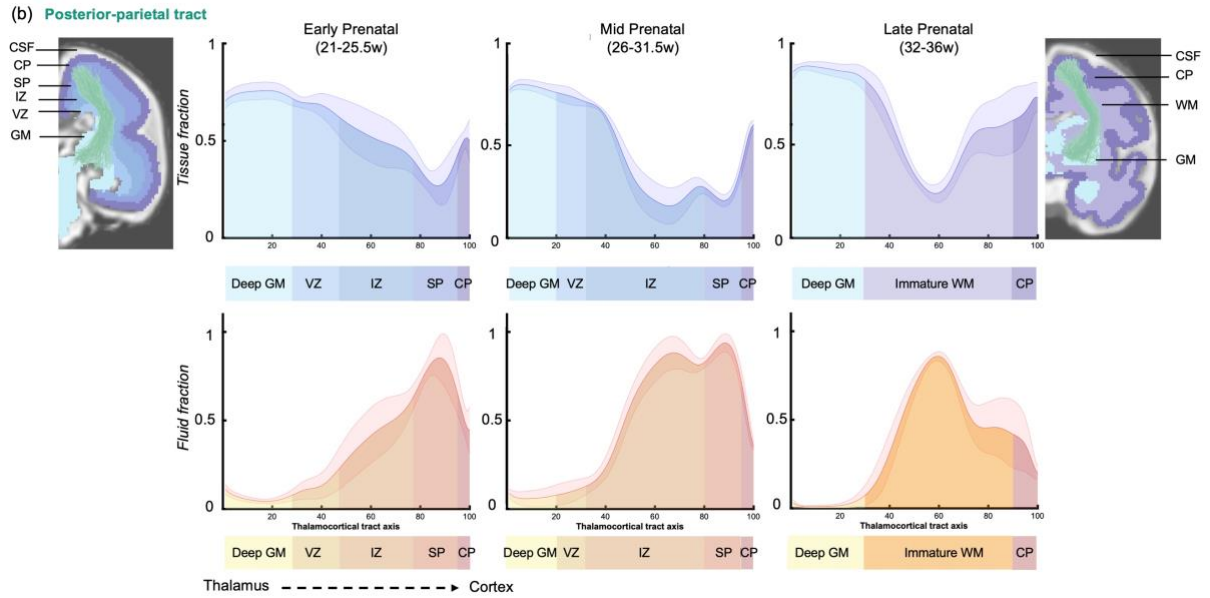

Supplement: supp [file elife-83727-supp-v1.zip]
